# Supplementary material for: Lipid raft-based membrane order is important for antigen-specific clonal expansion of CD4+ T lymphocytes
Source: Springer Nature journal article supplement (doi:10.1186/s12865-014-0058-8), 2014-12-01
Supplement: MOESM1 [file 9736056]

## Supplementary Figure 1

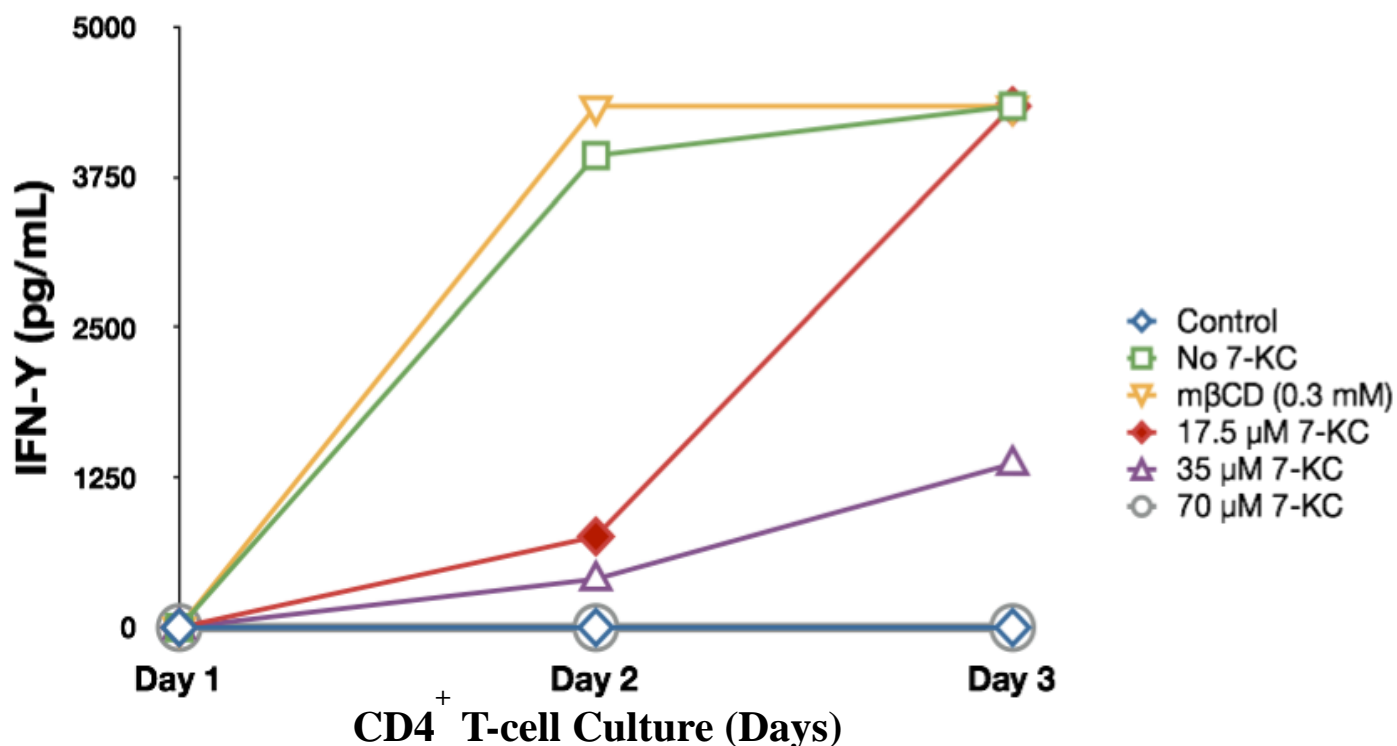

**Supplementary Figure 1.** 7-Keto cholesterol inhibits production of IFN- $\gamma$  by CD4<sup>+</sup> T cells in response to a specific antigen. Lymph node cells were cultured with c-Ova<sub>323-339</sub> peptide either in the absence or presence of various concentration of 7-KC. Cells exposed to 0.3mM mβcd, (vehicle control) (open inverted triangle), 17.5 μM 7-KC (filled diamond), 35 μM (open triangle), 70 μM (open circle) or left untreated (open square) were stimulated with c-Ova<sub>323-339</sub> and supernatant was harvested on days 1, 2 and 3 to quantify IFN- $\gamma$  by ELISA (BD Biosciences). Supernatants from cultures stimulated with control peptide, cOva<sub>324-334</sub> was used as controls (open diamond). A representative data out of total three experiments is shown.
